# Supplementary material for: Corrigendum to “Nursery Growing Media: Agronomic and Environmental Quality Assessment of Sewage Sludge-Based Compost”
Source: Hindawi journal article supplement (doi:10.1155/2017/2829613), 2017-12-31
Supplement: f1 [file 2829613.f1.zip]

Archive with 5 entries (5 files):
- Acta hort Raw data Figg 2- 5..xlsx
- AESS Raw data  Tables 4-5-6.xlsx
- AESS Raw data  Tables 9-10.xlsx
- AESS Raw data Fig 1.xlsx
- AESS Raw Data mats Table 3.xlsx
