# Supplementary material for: Corrigendum to “Nursery Growing Media: Agronomic and Environmental Quality Assessment of Sewage Sludge-Based Compost”
Source: Hindawi journal article supplement (doi:10.1155/2017/2829613), 2017-12-31
Supplement: f1 [file 2829613.f1.zip › Acta hort Raw data Figg 2- 5..xlsx]

## Sheet: Dat 90
RIP	GM	Leaves	Unit. Leaf area	Total FW	Dry matter
1	SSC0	70.85	28.91	88.05	15.8
2	SSC0	61.72	25.72	86.22	17.5
3	SSC0	57.38	25.82	83.89	18.3
1	SSC25	63.09	26.5	90.25	17.8
2	SSC25	73.64	25.17	91.85	18.18
3	SSC25	58.99	25.8	88.09	18.64
1	SSC40	76.21	26.2	89.03	18.9
2	SSC40	79.96	23.25	83.24	16.8
3	SSC40	35.03	25	89.61	16.5
1	SSC55	52.63	22.64	80.7	21.2
2	SSC55	71.58	21.2	43.3	20.9
3	SSC55	73.95	21.54	73.9	19.7
1	SSC70	59.48	21.81	50.81	22.6
2	SSC70	62.89	17.03	37.61	22.8
3	SSC70	67.3	14.61	58.47	22.7

## Sheet: Dat 120
RIP	GM	Leaves	Unit. Leaf area	Total FW	Dry matter
1	SSC0	128.86	31.02	116.09	28.1
2	SSC0	130.07	25.72	187.13	25.4
3	SSC0	132.29	26.32	156.97	25.8
1	SSC25	130.18	30.64	219.7	25.7
2	SSC25	124.51	25.75	207.03	22.7
3	SSC25	133.68	31.02	218.55	26.3
1	SSC40	153.61	30.75	207.16	26.7
2	SSC40	140.08	27.88	220.2	25.2
3	SSC40	145.53	28.13	218.11	24.7
1	SSC55	152.6	25.5	206.46	27.4
2	SSC55	154.38	27.53	211.95	22.7
3	SSC55	156.91	25.52	227.96	25.9
1	SSC70	157.66	22.7	238.64	25.3
2	SSC70	157.45	21.5	213.51	21.1
3	SSC70	159.1	22.4	200.99	26.6

## Sheet: Dat 150
RIP	GM	Leaves	Unit. Leaf area	Total FW	Dry matter
1	SSC0	197.62	27.8	484.3	27.9
2	SSC0	197.28	30.41	485.1	25.12
3	SSC0	208.6	28.46	470.7	26
1	SSC25	202.97	33	468.21	28
2	SSC25	194.06	27.23	476.2	22.4
3	SSC25	201.68	32.8	473.4	28.7
1	SSC40	237.76	30.1	467.4	26.9
2	SSC40	238.3	29.02	482.9	25.6
3	SSC40	237.12	30.53	488.3	21
1	SSC55	245.45	32.7	628.4	27.5
2	SSC55	246.28	33.5	590.5	22.8
3	SSC55	254.13	30.52	554.1	22.6
1	SSC70	242.15	31.89	521	25.7
2	SSC70	248.03	32.52	570	21.1
3	SSC70	249.26	31.36	562.9	24.8
