# Supplementary material for: Corrigendum to “Nursery Growing Media: Agronomic and Environmental Quality Assessment of Sewage Sludge-Based Compost”
Source: Hindawi journal article supplement (doi:10.1155/2017/2829613), 2017-12-31
Supplement: f1 [file 2829613.f1.zip › AESS Raw data Fig 1.xlsx]

## Sheet: Fig1 -90DAT
Rip	GM	Leaves	T leaf area	FreshWei	DryWeight
1	SSC0	62.1612	1606.83	90.3571	13.4937
2	SSC0	59.9676	1424.97	83.4992	12.8254
3	SSC0	73.438	2268.88	94.4427	12.9235
1	SSC25	76.065	2396.15	99.0967	10.8667
2	SSC25	61.164	1596.27	92.4162	18.2448
3	SSC25	65.2032	1839.12	88.8535	17.0617
1	SSC40	81.24	1788.17	81.784	13.8674
2	SSC40	36.7344	923.667	90.2468	15.2922
3	SSC40	78.1326	2039.23	95.7309	18.4387
1	SSC55	74.3505	1554.73	40.9654	14.2492
2	SSC55	76.0424	1386.6	76.5216	12.8892
3	SSC55	54.8316	1493.67	89.1934	15.4071
1	SSC70	64.9088	1100.59	30.5564	12.7668
2	SSC70	69.0414	1021.41	37.2037	14.3196
3	SSC70	61.6344	1360.77	84.1529	11.5507

## Sheet: Fig1 -120DAT
Rip	GM	Leaves	T leaf area	FreshWei	DryWeight
1	SSC0	131.8	3851.6	195.153	41.0905
2	SSC0	135.1	3819.7	162.413	41.2742
3	SSC0	135.2	3777.4	116.833	39.7476
1	SSC25	127.478	3359.8	212.69	47.3575
2	SSC25	136.695	4294.7	224.398	59.5042
3	SSC25	133.883	3999.4	225.661	56.6379
1	SSC40	144.302	4062.6	226.375	58.7754
2	SSC40	148.326	4287	224.572	58.16
3	SSC40	155.93	4831.3	209.074	58.5713
1	SSC55	158.922	3675.71	215.064	49.5654
2	SSC55	157.141	4172.26	237.781	61.4795
3	SSC55	161.459	3786.77	212.933	57.9369
1	SSC70	162.794	3443.99	219.221	45.8306
2	SSC70	163.984	3492.3	211.321	56.6012
3	SSC70	162.688	3979.05	247.251	62.2914

## Sheet: Fig1 -150DAT
Rip	GM	Leaves n	T leaf area	FreshWei	DryWeight
1	SSC0	201.66	6137.94	488.767	88.6625
2	SSC0	215.186	6109.16	482.797	86.3612
3	SSC0	203.939	5742.19	493.889	96.6274
1	SSC25	199.1	5690.9	485.074	106.111
2	SSC25	206.4	5775.8	474.667	114.797
3	SSC25	208.1	6835.9	469.698	111.507
1	SSC40	246.937	7402.02	471.9	117.1
2	SSC40	241.056	7487.14	486.9	115.6
3	SSC40	239.167	7050.96	492.8	119.5
1	SSC55	248.5	8641.99	593.127	136.797
2	SSC55	260	8708.76	554.931	133.164
3	SSC55	253.2	8711.16	643.733	163.481
1	SSC70	250.825	8319.43	575.586	132.559
2	SSC70	255.281	8089.37	569.747	133.11
3	SSC70	252.063	7985.53	531.66	133.377
