# Supplementary material for: Corrigendum to “Nursery Growing Media: Agronomic and Environmental Quality Assessment of Sewage Sludge-Based Compost”
Source: Hindawi journal article supplement (doi:10.1155/2017/2829613), 2017-12-31
Supplement: f1 [file 2829613.f1.zip › AESS Raw Data mats Table 3.xlsx]

## Sheet: Table 3
Rip	RM	pH	EC	BDD	EAW	Sh
1	SSC	7.86	5.58	0.42	9.96	13.13
2	SSC	7.95	5.51	0.47	9.91	13.21
3	SSC	7.88	5.53	0.45	9.92	13.16
1	A	5.72	0.24	0.41	1.21	0
2	A	5.69	0.27	0.36	1.23	0
3	A	5.73	0.28	0.38	1.14	0
1	Pu	6.78	0.08	0.85	2.91	0
2	Pu	6.75	0.09	0.78	2.87	0
3	Pu	6.64	0.06	0.8	2.85	0
1	S	6.46	0.12	1.63	10.46	0
2	S	6.45	0.08	1.6	10.34	0
3	S	6.39	0.09	1.64	10.49	0
1	P	5.67	0.34	0.11	6.5	15.39
2	P	5.64	0.35	0.13	6.54	15.32
3	P	5.56	0.31	0.16	6.56	15.28
