# Supplementary material for: Corrigendum to “Nursery Growing Media: Agronomic and Environmental Quality Assessment of Sewage Sludge-Based Compost”
Source: Hindawi journal article supplement (doi:10.1155/2017/2829613), 2017-12-31
Supplement: f1 [file 2829613.f1.zip › AESS Raw data Tables 4-5-6.xlsx]

## Sheet: growmediarawdataTABLE 4
Rip	GM	pH	EC	BDD	EAW	Sh
1	SSC0	5.84	0.52	0.27	15.82	16.13
2	SSC0	5.76	0.37	0.29	11.59	15.69
3	SSC0	5.81	0.46	0.28	13.72	15.78
1	SSC25	6.45	1.56	0.36	12.08	14.81
2	SSC25	6.32	1.48	0.35	14.05	15.42
3	SSC25	6.31	1.53	0.33	9.91	14.67
1	SSC40	6.32	2.2	0.4	5.89	14.33
2	SSC40	6.79	2.09	0.38	5.98	14.09
3	SSC40	6.39	2.16	0.38	6.17	13.88
1	SSC55	6.87	2.93	0.44	5.97	13.56
2	SSC55	6.83	2.76	0.47	5.78	13.41
3	SSC55	6.86	2.85	0.43	5.83	13.23
1	SSC70	6.93	3.85	0.54	5.11	12.84
2	SSC70	6.87	3.78	0.57	5.01	13.19
3	SSC70	6.91	3.77	0.55	5.07	13.01

## Sheet: growimedia rawdata TABLE 5
Rip	GM	N	P	K	Ca	Mg	Fe	Mn
1	SSC0	338	1612	965	5796	750	268	70
2	SSC0	321	1498	1131	5832	603	242	70
3	SSC0	332	1573	985	6155	628	206	67
1	SSC25	544	3068	2044	19928	1752	923	114
2	SSC25	557	2861	2056	15936	1686	958	112
3	SSC25	549	2957	2074	16173	1608	919	116
1	SSC40	804	3012	2751	19182	3004	1037	136
2	SSC40	866	3098	2803	18819	2806	1130	122
3	SSC40	700	3040	2741	17956	2542	1100	126
1	SSC55	997	3848	2812	21482	3864	1192	169
2	SSC55	885	3714	2651	21365	3555	1054	132
3	SSC55	778	4012	2613	19723	3776	1318	107
1	SSC70	1032	4473	2804	21389	4032	1478	123
2	SSC70	991	4391	2805	20866	4078	1154	147
3	SSC70	1008	4375	2806	24728	4011	1328	183

## Sheet: growimedia rawdata TABLE 6
Rip	GM	Pb	Cd	Ni	Zn	Cu	Cr
1	SSC0	7.83	0.09	1.58	13.28	13.98	0.34
2	SSC0	12.21	0.02	1.68	10.19	12.56	0.36
3	SSC0	16.08	0.08	1.48	12.55	12.42	0.31
1	SSC25	32.96	0.25	1.77	91.12	12.68	0.33
2	SSC25	33.56	0.19	1.68	76.01	11.43	0.31
3	SSC25	33.18	0.14	1.89	79.01	15.01	0.32
1	SSC40	34.22	0.24	2.5	105.64	14.09	0.31
2	SSC40	33.64	0.15	2.74	97.34	18.71	0.36
3	SSC40	34.13	0.28	2.45	105	12.32	0.34
1	SSC55	35.87	0.33	4.17	100.33	19.71	0.36
2	SSC55	35.31	0.3	3.39	165.12	12.27	0.33
3	SSC55	35.79	0.22	2.41	105.39	19.09	0.31
1	SSC70	47.96	0.37	4.52	147.77	18.03	0.35
2	SSC70	47.65	0.27	4.24	144.18	18.05	0.29
3	SSC70	46.86	0.28	3.63	137.09	17.92	0.28
