# Supplementary material for: Corrigendum to “Nursery Growing Media: Agronomic and Environmental Quality Assessment of Sewage Sludge-Based Compost”
Source: Hindawi journal article supplement (doi:10.1155/2017/2829613), 2017-12-31
Supplement: f1 [file 2829613.f1.zip › AESS Raw data Tables 9-10.xlsx]

## Sheet:  tissue cont macro TABLE 9
RIP	GM	N	P	K	Ca	Mg	Na
1	SSC0	24.1	6.63	39.95	19.65	10.46	4.06
2	SSC0	27.4	6.39	38.57	19.89	9.25	4.07
3	SSC0	24.1	6.58	36.37	19.54	9.18	3.9
1	SSC25	28.4	7.09	40.05	19.02	14.11	4.5
2	SSC25	25.2	7.04	42.06	19.18	14.17	4.55
3	SSC25	28.4	6.94	39.09	19.25	9.02	4.6
1	SSC40	30.4	7.43	46.07	21.15	15.36	5.65
2	SSC40	30	7.62	44.03	21.22	13.56	5.25
3	SSC40	30.2	7.49	45.49	20	13.98	5.01
1	SSC55	30.9	7.5	45.02	20.43	16.08	5.83
2	SSC55	31.6	7.77	49.29	20.93	16.22	6.16
3	SSC55	31.9	7.92	50.59	22.01	14.86	5.12
1	SSC70	35.7	8.33	58.26	24.17	19.14	5.18
2	SSC70	35.1	8.41	56.12	23.01	18.16	6.34
3	SSC70	35.3	8.47	54.22	23.12	18.27	6.23

## Sheet:  tissue cont micro TABLE 10
RIP	GM	Fe	B	Mn	Cu	Zn
1	SSC0	143.2	32.06	119.62	27.53	67.2096
2	SSC0	135.8	31.94	125.53	28.45	81.4066
3	SSC0	136.9	32.3	120.24	27.72	77.6642
1	SSC25	152.1	29.34	90.49	32.97	122.8
2	SSC25	143.1	29.76	90.36	32.99	135.723
3	SSC25	127.9	31.8	91	25.48	115.458
1	SSC40	143.1	33.53	86.25	34.14	142.359
2	SSC40	151.8	32.76	92.92	32.59	128.982
3	SSC40	143.2	33.62	86.63	30	128.034
1	SSC55	150.7	31.86	81.93	36.92	149.79
2	SSC55	152.9	30.88	84.71	37.02	161.31
3	SSC55	164.4	30.12	84.86	36.73	143.96
1	SSC70	168.5	31.92	86	41.81	167.13
2	SSC70	174.3	28.74	85.32	35.76	154.6
3	SSC70	164.2	33.88	84.84	42.17	160.64
